# Supplementary material
Source: Springer Nature journal article supplement (https://www.springermedizin.de/resource/supplementary/13013_2009_131_MOESM2_ESM.pdf/9631310)

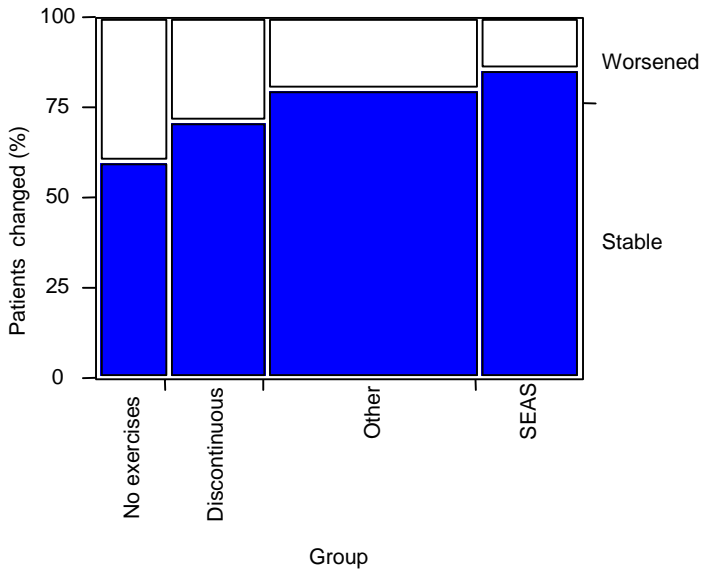

Supplement: MOESM2 [file 9631310]
